# Supplementary material
Source: Research Square preprint supplement (doi:10.21203/rs.3.rs-8908787/v1)
Supplement: Supplementary file 1 [file 579a502c14759a71534b95a4.docx]

Supplementary material 1

**Research Informed Consent Form**

Greeting！

I am currently undertaking a research project entitled “*Digital Health Literacy in School Physical Education: A Grounded Theory Framework for Teacher Competence”*. I would be most grateful if you would consider participating in this study by sharing your insights and suggestions, which will be invaluable to its development. You retain complete autonomy over whether to participate. We shall fully respect your decision. Please find below relevant information for your consideration:

**1. Research Origins and Funding Support**

This study originates from a research project supported by the Ministry of Education's Humanities and Social Sciences Research Programme (Project Approval Number: 18YJC890033).

1. **The research significance is as follows:**
2. Theoretical Significance:
3. Research on physical education teachers' digital health literacy expands the theoretical framework for health education and teacher professional development.
4. It enriches studies on digital health literacy within educational contexts, providing structured theoretical support for integrating digital health into school health education.
5. Practical Significance:
6. It provides a structured framework for assessing and enhancing physical education teachers' digital health literacy, supporting their professional development and teaching innovation.
7. It offers evidence-based reference points for designing teacher training programmes, improving teaching quality, and formulating digital health education policies.
8. We believe that your comments and suggestions will provide valuable ideas for this paper.

4.The information you fill in will only be used for the purpose of this paper, and weguarantee that we will not disclose your personal information.

**Thank you for your full support and cooperation, If you have any questions,please feel free to contact us.**
